# Supplementary material for: Beyond aspirin—cancer prevention with statins, metformin and bisphosphonates
Source: Springer Nature journal article supplement (doi:10.1038/nrclinonc.2013.169), 2013-10-01
Supplement: 41571_2013_BFnrclinonc2013169_MOESM16_ESM.pdf [file 41571_2013_BFnrclinonc2013169_MOESM16_ESM.pdf]

| Supplementary Table 1   Statins: clinical studies mostly evaluating cancer as a secondary outcome of interest beyond cardiovascular events, and registry-based studies |             |                                                                                                        |                                                                                                                   |                                                                                                                                                  |                                                                                                                                    |
|------------------------------------------------------------------------------------------------------------------------------------------------------------------------|-------------|--------------------------------------------------------------------------------------------------------|-------------------------------------------------------------------------------------------------------------------|--------------------------------------------------------------------------------------------------------------------------------------------------|------------------------------------------------------------------------------------------------------------------------------------|
| Study                                                                                                                                                                  | Tumour site | Design                                                                                                 | Cases/Controls                                                                                                    | Adjustments                                                                                                                                      | Major findings                                                                                                                     |
| <i>Clinical studies of the association between statin use and all cancer risk</i>                                                                                      |             |                                                                                                        |                                                                                                                   |                                                                                                                                                  |                                                                                                                                    |
| Shepherd <i>et al.</i> (1995) <sup>1</sup>                                                                                                                             | All         | Double-blind RCT pravastatin or placebo                                                                | 6,595 hyperlipidemic middle aged men                                                                              | –                                                                                                                                                | Mean follow-up 4.9 years. No significant difference in number of deaths from cancer.                                               |
| Sacks <i>et al.</i> (1996) <sup>2</sup>                                                                                                                                | All         | Double-blind RCT pravastatin or placebo (CARE)                                                         | 4,159 coronary heart disease patients                                                                             | –                                                                                                                                                | Median follow-up 5 years. No significant difference in overall or cancer mortality.                                                |
| LIPID study group (1998) <sup>3</sup>                                                                                                                                  | All         | Double-blind RCT pravastatin or placebo (LIPID)                                                        | 9,014 coronary heart disease patients                                                                             | –                                                                                                                                                | Mean follow up 6.1 years. Non-statistically significant difference in cancer deaths.                                               |
| Downs <i>et al.</i> (1998) <sup>4</sup>                                                                                                                                | All         | Double-blind RCT lovastatin or placebo (AFCAPS and TexCAPS)                                            | 6,605 without CVD (primary prevention)                                                                            | –                                                                                                                                                | Mean follow up 5.2 years. No difference in cancer incidence except for a reduction in melanoma in lovastatin group ( $P = 0.04$ ). |
| ALLHAT collaborative research group (2002) <sup>5</sup>                                                                                                                | All         | RCT pravastatin or usual care (ALLHAT-LLT)                                                             | 10,355 participants drawn from ALLHAT with higher representation of older, women, ethnic minorities and diabetics | Not blinded                                                                                                                                      | Mean follow up 4.8 years. Non-statistically significant differences in cancer deaths and in 6-year incidence cancer rate.          |
| Shepherd <i>et al.</i> (2002) <sup>6</sup>                                                                                                                             | All         | RCT pravastatin or placebo (PROSPER)                                                                   | 5,804 elderly                                                                                                     | Single blindness                                                                                                                                 | Mean follow up 3.2 years. More diagnoses of new cancers in pravastatin group RR = 1.25 (1.04-1.51).                                |
| Heart Protection Study Collaborative Group (2005) <sup>7</sup>                                                                                                         | All         | RCT simvastatin or placebo                                                                             | 20,536 vascular disease or diabetes patients                                                                      | Single-blindness                                                                                                                                 | Mean follow up 5 years. Cancer incidence rates similar                                                                             |
| Pedersen <i>et al.</i> (2000) <sup>8</sup>                                                                                                                             | All         | Post RCT observational for an additional 2 years following randomization to simvastatin or placebo for | 4,444 coronary heart disease patients                                                                             | Not accounted for: after the double blind period, most patients in both groups received simvastatin at the discretion of the treating physician. | Median follow up 7.4 years. Non-statistically significant fewer cancer deaths (2.3% vs 3.1%) in the simvastatin group compared     |

|                                                                 |     |                                                                                                                        |                                                                                                                                                            |                                                                                                                                                                     |                                                                                                                                                                                                                   |
|-----------------------------------------------------------------|-----|------------------------------------------------------------------------------------------------------------------------|------------------------------------------------------------------------------------------------------------------------------------------------------------|---------------------------------------------------------------------------------------------------------------------------------------------------------------------|-------------------------------------------------------------------------------------------------------------------------------------------------------------------------------------------------------------------|
|                                                                 |     | 5.4 years (4S)                                                                                                         |                                                                                                                                                            |                                                                                                                                                                     | to the placebo group.                                                                                                                                                                                             |
| Strandberg <i>et al.</i> (2004) <sup>9</sup>                    | All | Post RCT observational, for an additional 5 years following randomization to simvastatin or placebo for 5.4 years (4S) | 4,444 coronary heart disease patients                                                                                                                      | Most participants on statins during the follow-up period                                                                                                            | Median follow up 10.4 years. Non-statistically less cancer deaths and less incident cancers in the (original) simvastatin group.                                                                                  |
| Heart Protection study collaborative group (2011) <sup>10</sup> | All | Post RCT observational following randomization to simvastatin or placebo for a mean of 5 years (Heart Protection)      | 20,536 vascular disease or diabetes patients                                                                                                               | single-blindness                                                                                                                                                    | Mean total follow up 11 years. No difference in cancer incidence or cancer deaths                                                                                                                                 |
| Jacobs <i>et al.</i> (2011) <sup>11</sup>                       | All | Prospective cohort                                                                                                     | 133,255 participants in the CPS-II nutrition cohort                                                                                                        | Age, sex, race, education, smoking, NSAIDs, BMI, physical activity, cholesterol, diabetes, heart disease, hypertension, screening, HRT, alcohol, geographic region. | Lower risk of melanoma RR=0.70 (0.55-0.88), endometrial cancer RR=0.53 (0.32-0.87) and non-Hodgkin lymphoma RR=0.77 (0.62-0.94)                                                                                   |
| Kaye <i>et al.</i> (2004) <sup>12</sup>                         | All | Historical cohort                                                                                                      | 3,244 hyperlipidemic patients, 14,844 age-, sex-, general practice-, year of database entry-, index date-matched controls with no hyperlipidemia diagnosis | BMI, smoking, visit frequency                                                                                                                                       | Median follow up 6.4 years. No increased cancer risk. Marginally increased risk for colorectal cancer in a subset of long term statin users (>60 months)                                                          |
| Friis <i>et al.</i> (2005) <sup>13</sup>                        | All | Historical cohort                                                                                                      | 12,251 statin users, 334,754 non-users, 1,257 other lipid-lowering drugs-users                                                                             | Age, gender, calendar period, use of NSAIDs, hormone replacement therapy, CVD drugs                                                                                 | Mean follow up 3.3 years. adjusted RR for overall cancer in statin users 0.86 (0.78–0.95) compared to nonusers, and 0.73 (0.55–0.98) compared to other lipid-lowering users. No trend with longer duration of use |

|                                              |     |                   |                                                                                                       |                                                                                                                                                                          |                                                                                                                                                                                                                                       |
|----------------------------------------------|-----|-------------------|-------------------------------------------------------------------------------------------------------|--------------------------------------------------------------------------------------------------------------------------------------------------------------------------|---------------------------------------------------------------------------------------------------------------------------------------------------------------------------------------------------------------------------------------|
| Setoguchi <i>et al.</i> (2007) <sup>14</sup> | All | Historical cohort | 24,439 statin initiators, 7,284 controls                                                              | IBD, arthritis, mammary dysplasia, estrogen use, NSAIDs, obesity, BMI, smoking, functional status, aspirin, education, health care utilization, family history of cancer | Mean follow up 2.9 years. Similar incidence rates of colorectal, lung and breast cancers                                                                                                                                              |
| Farwell <i>et al.</i> (2008) <sup>15</sup>   | All | Historical cohort | 37,248 statin users (mostly simvastatin and lovastatin) and 25,594 hypertensive controls              | Comorbidities, aspirin use, sex, smoking, age, weight                                                                                                                    | Median follow up 5 years. Statin users had lower risk for overall cancer incidence HR = 0.74 (0.70–0.78) and specifically prostate, lung, and colorectal cancers. Decreased risk of lung, CRC and melanoma with increasing statin use |
| Smeeth <i>et al.</i> (2008) <sup>16</sup>    | All | Historical cohort | 129,288 statin prescribers, 600,241 sex-, age-, general practice-, propensity score-matched controls. | Smoking, BMI, comorbidities. Some in the control group were prescribed statin later.                                                                                     | Median follow up 4.4 years. No difference in incidence of all cancers, or GI, prostatic and breast cancers                                                                                                                            |
| Friedman <i>et al.</i> (2008) <sup>17</sup>  | All | Historical cohort | 361,859 statin prescribers, 3,881,208 controls                                                        | Smoking, HRT, NSAIDs                                                                                                                                                     | In more than 5 years of use: increased HR for all cancers HR 1.09 (1.02-1.17) only in men. Increased HR only in men for oesophagus, skin, bladder, thyroid cancers.                                                                   |
| Haukka <i>et al.</i> (2009) <sup>18</sup>    | All | Historical cohort | 472,481 statin users and 472,481 sex-, age-, region-matched controls                                  | BMI, comorbidities, other drugs                                                                                                                                          | Mean follow up 8.8 years. No association with overall cancer incidence. Lower incidence of lung, colon and stomach cancers in lovastatin users with increased drug exposure                                                           |
| Marelli <i>et al.</i> (2011) <sup>19</sup>   | All | Historical cohort | 45,857 propensity-score-matched pairs of statin users and nonusers                                    | Sex, age, race, smoking status, BMI, time in database, concomitant diagnoses, preventive screening, concomitant medications, calendar time                               | Mean follow up time 4.7 years. No difference in cancer incidence                                                                                                                                                                      |

|                                                |     |                            |                                                                                                                                                                        |                                                                                                                                                                                                                                |                                                                                                                                                                                                                               |
|------------------------------------------------|-----|----------------------------|------------------------------------------------------------------------------------------------------------------------------------------------------------------------|--------------------------------------------------------------------------------------------------------------------------------------------------------------------------------------------------------------------------------|-------------------------------------------------------------------------------------------------------------------------------------------------------------------------------------------------------------------------------|
| Frohlich <i>et al.</i> (2012) <sup>20</sup>    | All | Historical cohort          | 255 single-centre heart transplanted patients that survived the first year                                                                                             | Age, sex, type of cardiomyopathy, immunosuppressive therapy, cholesterol level                                                                                                                                                 | Median follow-up 12.6 years. Reduced occurrence of any malignancy HR = 0.33 (0.21–0.51). Patients receiving statins for >50% of the follow-up time had a lower risk of malignancy.                                            |
| Nielsen <i>et al.</i> (2012) <sup>21</sup>     | All | Historical cohort          | 295, 925 cancer patients. 18,721 statin users and sex, age, year of diagnosis, cancer type-matched non statin user controls                                            | Cancer stage, chemotherapy, CVD, diabetes, area-code, race, ethnic descent, education, size of residential area                                                                                                                | Median follow-up 2.6 years. Cumulative incidence of death from cancer lower among statin users HR = 0.85 (0.82–0.87), with no dose-response relationship                                                                      |
| Blais <i>et al.</i> (2000) <sup>22</sup>       | All | Nested case-control        | 542 incident cases of malignant neoplasms, 5,420 randomly selected controls                                                                                            | Age, sex, calendar year, use of other medications, comorbidity, prior neoplasm                                                                                                                                                 | Median follow-up 2.7 years. Statin users were 28% less likely than controls to be diagnosed with cancer adjusted RR = 0.72 (0.57–0.92)                                                                                        |
| Graaf <i>et al.</i> (2004) <sup>23</sup>       | All | Nested case-control        | Within all patients prescribed cardiovascular medications, 3,129 incident cancer cases, 16,976 sex, age, geographic region-, duration of follow up, index date-ontrols | DM, prior hospitalization, comorbidity, use of diuretics, ace inhibitors, calcium channel blockers, NSAIDs, sex hormones, other lipid lowering drugs                                                                           | Median follow-up 7.2 years. Statin use associated with 20% cancer risk reduction OR = 0.80 (0.66–0.96). OR = 0.64 (0.44–0.93) if 4 or more years of treatment. Site-specific reduction was significant only for renal cancer. |
| Vinogradova <i>et al.</i> (2011) <sup>24</sup> | All | Retrospective case-control | 88,125 cancer patients, 362,254 age, sex-, practice-, calendar time-matched non-cancer controls                                                                        | DM, rheumatoid arthritis, hypertension, BMI, smoking, socioeconomic status, CVD, benign breast disease, family history of breast cancer, colitis, Crohn's disease, NSAIDs, COX-2 inhibitors, aspirin, HRT, oral contraceptives | At least 6 years follow-up. No association with overall risk of cancer. Atorvastatin: higher risk of colorectal cancer OR = 1.09 (1.01–1.18). Increased bladder risk OR = 1.29 (1.08–1.54) and increased lung cancer          |

|                                                                                      |        |                                                                    |                                                           |                                                                                                                                                                                                                                                                   |                                                                                                                                                                                                              |
|--------------------------------------------------------------------------------------|--------|--------------------------------------------------------------------|-----------------------------------------------------------|-------------------------------------------------------------------------------------------------------------------------------------------------------------------------------------------------------------------------------------------------------------------|--------------------------------------------------------------------------------------------------------------------------------------------------------------------------------------------------------------|
|                                                                                      |        |                                                                    |                                                           |                                                                                                                                                                                                                                                                   | OR = 1.18 (1.05–1.34) with long-term usage. Reduced risk of haematological malignancies OR = 0.78 (0.71–0.86).                                                                                               |
| <b>Clinical studies of the association between statin use and breast cancer risk</b> |        |                                                                    |                                                           |                                                                                                                                                                                                                                                                   |                                                                                                                                                                                                              |
| Cauley <i>et al.</i> (2003) <sup>25</sup>                                            | Breast | Prospective cohort SOF study                                       | 7,528 community dwelling women                            | BMI, ages at menarche, first birth and menopause, parity, family history of breast cancer, alcohol, physical activity, smoking, HRT, education, health status, mammography use, bone density                                                                      | Mean follow-up 6.8 years. RR = 0.28 (0.09–0.86) for statin users (mostly lovastatin), 0.36 (0.13–0.97) for users of other non-statin lipid-lowering drugs vs no users.                                       |
| Cauley <i>et al.</i> (2006) <sup>26</sup>                                            | Breast | Prospective cohort and clinical trials (Women's Health Initiative) | 156,351 postmenopausal women                              | Ethnicity, DM, hypercholesterolemia, IHD, benign breast disease, educational level, family history of breast cancer, hysterectomy, oophorectomy, ages at menarche and first birth, parity, NSAIDs, aspirin, smoking, physical activity, alcohol, fat in diet, BMI | Mean follow up 6.7 years. HR = 0.91 (0.80–1.05) of breast cancers among statin users, compared with no users. No trend with increased duration of use. Hydrophobic statins associated HR = 0.82 (0.70–0.97). |
| Kwan <i>et al.</i> (2008) <sup>27</sup>                                              | Breast | Prospective cohort (Life After Cancer Epidemiology [LACE] study)   | 1,811 early stage breast cancer survivors                 | Age, race, education, height, weight, smoking, family history of breast cancer, breast cancer treatment, tumour stage, nodal status, tumour hormone receptor status                                                                                               | Mean follow-up 5 years. Risk of recurrence decreased with increasing duration of statin use after diagnosis ( <i>P</i> for linear trend 0.02). Lipophilic statins mainly used.                               |
| Boudreau <i>et al.</i> (2007) <sup>28</sup>                                          | Breast | Historical cohort                                                  | 92,788 women, 7.4% of which were statin-users for >1 year | Weight, height, race, education, parity, menopause, family history of breast cancer, DM, HRT                                                                                                                                                                      | Median follow-up 6.4 years. Lovastatin and simvastatin mostly used. No difference in breast cancer risk HR = 1.07 (0.88–1.29)                                                                                |

|                                                                                          |        |                                                                  |                                                                                                                                                      |                                                                                                                                                                                                                                                                                 |                                                                                                                                                                                          |
|------------------------------------------------------------------------------------------|--------|------------------------------------------------------------------|------------------------------------------------------------------------------------------------------------------------------------------------------|---------------------------------------------------------------------------------------------------------------------------------------------------------------------------------------------------------------------------------------------------------------------------------|------------------------------------------------------------------------------------------------------------------------------------------------------------------------------------------|
| Ahern <i>et al.</i> (2011) <sup>29</sup>                                                 | Breast | Historical cohort                                                | 18,769 invasive breast cancer women                                                                                                                  | Age, menopause, histological grade, tumour receptor status, adjuvant therapy, type of surgery, HRT, aspirin, ACE inhibitors, NSAIDs, anticoagulants, comorbidity                                                                                                                | Median follow up 6.8 years. 10-year adjusted HR = 0.73, (0.60–0.89) for recurrences in exclusive lipophilic statins users.                                                               |
| Kaye <i>et al.</i> (2002) <sup>30</sup>                                                  | Breast | Retrospective case-control                                       | 224 incident breast cancer cases (including <i>in situ</i> ), 1,009 age-, sex-, general practice-, duration of history-, index date-matched controls | BMI, HRT, history of benign breast disease                                                                                                                                                                                                                                      | Risk of breast cancer increased in untreated hyperlipidemic RR = 1.6 (1.1–2.5). RR = 1.0 (0.6–1.6) for breast cancer among statin users.                                                 |
| Boudreau <i>et al.</i> (2004) <sup>31</sup>                                              | Breast | Retrospective case-control                                       | 975 women ages 65-79 years with invasive breast carcinoma, 1,007 controls                                                                            | Age, reference date, county, HRT, weight, BMI, hypertension, hypertensive medications, smoking, income, education, alcohol, menopause, age at menopause, mammograms, family history of breast cancer, parity, age at first birth, use of other cholesterol-lowering medications | Lower breast cancer risk in long-term statin users (>5 years) OR = 0.7 (0.4–1.0)                                                                                                         |
| Woditschka <i>et al.</i> (2010) <sup>32</sup>                                            | Breast | Retrospective case-control                                       | 22,488 invasive breast cancer cases, 224,860 age-, duration of data base coverage-controls                                                           | Oral contraceptives, HRT, obesity, alcohol, race                                                                                                                                                                                                                                | No association between lipophilic statin use of ≥2 years and breast cancer risk                                                                                                          |
| <b>Clinical studies of the association between statin use and colorectal cancer risk</b> |        |                                                                  |                                                                                                                                                      |                                                                                                                                                                                                                                                                                 |                                                                                                                                                                                          |
| Jacobs <i>et al.</i> (2006) <sup>33</sup>                                                | CRC    | Prospective cohort (Cancer Prevention Study II Nutrition Cohort) | 132,136 participants                                                                                                                                 | Sex, NSAIDs, colorectal endoscopy, stage of colorectal cancer, cancer anatomic subsite                                                                                                                                                                                          | Follow-up 4 years. No association demonstrated.                                                                                                                                          |
| Ng <i>et al.</i> (2011) <sup>34</sup>                                                    | CRC    | Prospective cohort (post CALGB RCT study)                        | 842 stage III CRC patients                                                                                                                           | Age, sex, family history of colorectal cancer, ECOG performance status, cancer stage, CEA level, type of treatment arm, BMI, physical activity, diet, aspirin, COX-2 inhibitors.                                                                                                | Median follow-up 6.5 years. Disease-free survival, recurrence-free survival and overall survival were similar in statin users and non-users, regardless of KRAS mutation. (The study had |

|                                                |                     |                                                                                     |                                                               |                                                                                                                                                                                                                                                                                                                                                                                |                                                                                                                                                                                                                                                                                   |
|------------------------------------------------|---------------------|-------------------------------------------------------------------------------------|---------------------------------------------------------------|--------------------------------------------------------------------------------------------------------------------------------------------------------------------------------------------------------------------------------------------------------------------------------------------------------------------------------------------------------------------------------|-----------------------------------------------------------------------------------------------------------------------------------------------------------------------------------------------------------------------------------------------------------------------------------|
|                                                |                     |                                                                                     |                                                               |                                                                                                                                                                                                                                                                                                                                                                                | 80% power to detect HR of 0.55).                                                                                                                                                                                                                                                  |
| Lee <i>et al.</i> (2011) <sup>35</sup>         | CRC                 | Prospective cohort (Nurses' Health Study, and Health Professionals Follow up Study) | 1,818 CRC cases within 131,922 participants                   | Study, age, calendar year, BMI, aspirin, multivitamins, endoscopy, smoking, alcohol                                                                                                                                                                                                                                                                                            | Current statin use was not associated with colon cancer, but was inversely associated with rectal cancer RR = 0.59 (0.41–0.84), with no association with <i>KRAS</i> mutation, <i>PTGS2</i> (COX-2) expression, microsatellite instability status, CIMP (DNA methylation) status. |
| Simon <i>et al.</i> (2012) <sup>36</sup>       | CRC                 | Prospective cohort and clinical trials (WHI)                                        | 159,219 postmenopausal women                                  | Age, race/ethnicity, DM, hypercholesterolemia, CAD, educational level, family history of CRC, NSAIDs, aspirin, smoking, physical activity, alcohol, diet, BMI, calcium and selenium supplements, current health-care provider, last medical visit, history of colon polyp removal, hypertension, history of stroke, colon screening, HRT, nonstatin lipid lowering medications | Reduction in CRC risk associated with lovastatin HR = 0.62 (0.39-0.99)                                                                                                                                                                                                            |
| Bertagnolli <i>et al.</i> (2010) <sup>37</sup> | Colorectal adenomas | Prospective cohort (secondary analysis of RCT to celecoxib or placebo [APC trial])  | 2,028 patients at high risk for recurrent colorectal adenomas | Age, sex, aspirin, CVD events, hypertension, diabetes                                                                                                                                                                                                                                                                                                                          | Follow up of 5 years. Statin use >3 years increased (recurrent) adenoma risk RR = 1.39 (1.04–1.86). Celecoxib treatment eliminated the risk.                                                                                                                                      |

|                                                |     |                                                       |                                                                                        |                                                                                                                                                                                                                          |                                                                                                                                                                                                                                                            |
|------------------------------------------------|-----|-------------------------------------------------------|----------------------------------------------------------------------------------------|--------------------------------------------------------------------------------------------------------------------------------------------------------------------------------------------------------------------------|------------------------------------------------------------------------------------------------------------------------------------------------------------------------------------------------------------------------------------------------------------|
| Poynter <i>et al.</i> (2005) <sup>38</sup>     | CRC | Prospective case-control. Pharmacy records confirmed. | 1,953 CRC patients and 2,015 age-, sex-, clinic-, ethnicity-matched controls           | Aspirin, NSAIDs, physical activity, hypercholesterolemia, family history of CRC, ethnicity, vegetable consumption, level of education, red meat consumption                                                              | Use of statins (mostly simvastatin and pravastatin) for at least 5 years was associated with reduced relative risk of CRC adjusted OR = 0.53 (0.38–0.74). Strength of association similar for pravastatin and simvastatin.                                 |
| Samadder <i>et al.</i> (2011) <sup>39</sup>    | CRC | Prospective case-control. Pharmacy records confirmed. | 1,921 matched pairs of CRC cases and controls                                          | Aspirin, NSAIDs, family history of cancer, ethnicity, physical activity, smoking, vegetable consumption                                                                                                                  | Long term statin use (mostly simvastatin) was associated with reduced IBD-associated CRC OR = 0.07 (0.01-0.78) and non-IBD CRC OR = 0.49 (0.39–0.62).                                                                                                      |
| Coogan <i>et al.</i> (2007) <sup>40</sup>      | CRC | Retrospective case-control                            | 1,809 CRC patients, 1,809 age-, sex-, precinct-matched controls                        | Education, exercise, occupational physical activity, family history of CRC, alcohol, smoking, race, BMI, use of vitamin E, multivitamin, calcium supplements, HRT, NSAIDs, cholecystectomy, screening colonoscopy, diet. | No association between use of statins (mostly atorvastatin) and overall CRC risk. Risk of stage IV CRC lower among statin users OR = 0.49 (0.26–0.91).                                                                                                     |
| Vinogradova <i>et al.</i> (2007) <sup>41</sup> | CRC | Retrospective case-control                            | 5,686 incident CRC cases, 24,982 age-, calendar time-, sex-, practice-matched controls | Morbidity, smoking, BMI, socioeconomic status, ulcerative colitis, DM, IHD, hypertension, stroke, rheumatoid arthritis, osteoarthritis                                                                                   | Median follow up 7.3 years. Association between simvastatin use but not atorvastatin and CRC, OR = 0.83 (0.72–0.96). No significant trend with number of prescriptions. Prolonged use of NSAIDs and COX-2 inhibitors was associated with reduced CRC risk. |
| Hoffmeister <i>et al.</i> (2007) <sup>42</sup> | CRC | Retrospective case-control                            | 537 CRC cases, 612 sex-, age-, county of residence-matched controls                    | Other medications, former colorectal endoscopy, family history of CRC, rheumatic disease, DM, hyperlipidemia, HRT, diet, NSAIDs, alcohol, smoking,                                                                       | Non statistically significant reduction of CRC risk for regular use of low dose aspirin, OR = 0.77 (0.55–1.07).                                                                                                                                            |



|                                               |     |                            |                                                                                                    |                                                                                                                                                          |                                                                                                                                                                                                                                                                                                       |
|-----------------------------------------------|-----|----------------------------|----------------------------------------------------------------------------------------------------|----------------------------------------------------------------------------------------------------------------------------------------------------------|-------------------------------------------------------------------------------------------------------------------------------------------------------------------------------------------------------------------------------------------------------------------------------------------------------|
|                                               |     |                            |                                                                                                    | educational level, BMI, general health screening examination, physical activity                                                                          | Stronger association with regular statin use OR = 0.65 (0.43–0.99), strongest with simvastatin. Combined use of aspirin and statin for 5 years or more associated with risk reduction by 62% OR = 0.38 (0.15–0.97)                                                                                    |
| Yang <i>et al.</i> (2008) <sup>43</sup>       | CRC | Retrospective case-control | 4,432 incident CRC cases, 44,292 practice-, duration of follow up-, calendar time-matched controls | Smoking, alcohol, BMI, NSAIDs, aspirin, HRT, endoscopy                                                                                                   | Mean follow up 7.4 years. No association between statin use and CRC risk                                                                                                                                                                                                                              |
| Hachem <i>et al.</i> (2009) <sup>44</sup>     | CRC | Retrospective case-control | 6,080 CRC cases with DM, 24,320 sex-, age-matched controls                                         | IBD, DM severity, cholecystectomy, liver disease, DM medications, aspirin, NSAIDs, colorectal evaluation, previous colorectal polyps, cancer site, race. | Less statin prescription (mostly simvastatin) in colon cancer cases than in controls adjusted OR = 0.91 (0.86–0.96). Regular use (filled prescription greater than 80% of the time) was associated with further risk reduction OR = 0.83 (0.76–0.91). No duration-response relationship was observed. |
| Robertson <i>et al.</i> (2010) <sup>45</sup>  | CRC | Retrospective case-control | 9,979 CRC cases, 99,790 age-, gender-, county of residence-, matched controls                      | Aspirin, NSAIDs, cholecystectomy, DM, alcoholism                                                                                                         | Statin use slightly reduced CRC risk IRR = 0.87 (0.80–0.96), specifically simvastatin IRR = 0.88 (0.79–0.98). The association was not seen in long term users.                                                                                                                                        |
| Cheng <i>et al.</i> (2011) <sup>46</sup> (73) | CRC | Retrospective case-control | 1,156 CRC cases and, 4,624 age-, sex-, index date-matched                                          | DM, cholecystectomy, liver disease, colorectal polyps, IBD, other lipid lowering medications,                                                            | No association between statin use and CRC.                                                                                                                                                                                                                                                            |

|                                                                                                  |                     |                            |                                                                                                                  |                                                                                                                                                                   |                                                                                                                                                                                                                                                                    |
|--------------------------------------------------------------------------------------------------|---------------------|----------------------------|------------------------------------------------------------------------------------------------------------------|-------------------------------------------------------------------------------------------------------------------------------------------------------------------|--------------------------------------------------------------------------------------------------------------------------------------------------------------------------------------------------------------------------------------------------------------------|
|                                                                                                  |                     |                            | controls who were admitted to hospital for reasons unrelated to statins.                                         | NSAIDs, colonoscopy, FOBT, number of hospitalizations.                                                                                                            |                                                                                                                                                                                                                                                                    |
| Broughton <i>et al.</i> (2012) <sup>47</sup>                                                     | CRC                 | Retrospective case-control | 101 CRC patients and 132 controls, of symptomatic patients attending for diagnostic colonoscopy                  | Age, gender, alcohol, DM, aspirin, metformin, NSAIDs, calcium channel blockers, diabetes medications, indications for colonoscopy.                                | Inverse association between previous statin use (mostly simvastatin) and a diagnosis of CRC OR = 0.43 (0.25–0.80). Association stronger with higher statin doses OR = 0.19 (0.07–0.47), and greater duration of statin use: use over 5 years OR = 0.18 (0.06–0.55) |
| Lakha <i>et al.</i> (2012) <sup>48</sup>                                                         | CRC                 | Retrospective case-control | 309 CRC cases, 294 age-, sex-, region of residence-matched controls.                                             | Family history of CRC, previous cancer, bowel disease, BMI, smoking, physical activity, energy intake, deprivation category, NSAIDs, HRT, hormonal contraception. | Statins use associated with reduced CRC risk OR 0.33–0.42.                                                                                                                                                                                                         |
| Broughton <i>et al.</i> (2012) <sup>49</sup>                                                     | Colorectal adenomas | Retrospective case-control | 132 adenomatous polyp patients, 132 age-, sex-matched controls without polyps, attending diagnostic colonoscopy. | Aspirin, NSAIDs, metformin, other diabetic medications, calcium channel blockers, DM, IBD, family history of CRC, smoking, alcohol, BMI, HRT, parity.             | Negative association between prior statin use (mostly simvastatin) and a diagnosis of adenomatous polyps OR = 0.40 (0.24–0.76). Significantly stronger with higher doses OR = 0.33 (0.10–0.53), and longer duration of use OR = 0.36 (0.10–0.67)                   |
| <i>Clinical studies of the association between statin use and risk of cancer in other sites:</i> |                     |                            |                                                                                                                  |                                                                                                                                                                   |                                                                                                                                                                                                                                                                    |

|                                              |            |                                                                                  |                                          |                                                                                                                                                           |                                                                                                                                                                                                                                                   |
|----------------------------------------------|------------|----------------------------------------------------------------------------------|------------------------------------------|-----------------------------------------------------------------------------------------------------------------------------------------------------------|---------------------------------------------------------------------------------------------------------------------------------------------------------------------------------------------------------------------------------------------------|
| Kawata <i>et al.</i> (2001) <sup>50</sup>    | Liver      | RCT pravastatin/ no pravastatin along with standard chemotherapy                 | 83 consecutive unresectable HCC patients | –                                                                                                                                                         | Median survival longer in HCC cases assigned to pravastatin use                                                                                                                                                                                   |
| Kastelein <i>et al.</i> (2011) <sup>51</sup> | Oesophagus | Prospective cohort. Pharmacy records confirmed.                                  | 570 Barrett's oesophagus patients        | Age, gender, Barrett's oesophagus length, BMI, smoking, alcohol, family history, symptoms, histology, PPIs, NSAIDs, COX-2 inhibitors, aspirin.            | Median follow up 4.5 years. NSAIDs and statin use were each associated with a reduced risk of neoplastic progression HR = 0.47, HR = 0.46 respectively. Use of both NSAIDs and statins was associated with even lower risk HR = 0.22 (0.06–0.85). |
| Kantor <i>et al.</i> (2012) <sup>52</sup>    | Oesophagus | Prospective cohort                                                               | 395 Barrett's oesophagus patients        | Age, sex, smoking, NSAIDs, waist-hip ratio, education                                                                                                     | Inverse association between statin use and risk of progression to oesophageal carcinoma significant for high-grade dysplasia patients HR = 0.31 (0.11–0.86)                                                                                       |
| Liu <i>et al.</i> (2012) <sup>53</sup>       | Renal      | Prospective cohorts (Nurses' Health Study, Health Professional Follow up Study). | 80,782 women, 37,869 men.                | Age, BMI, smoking, hypertension, DM, NSAIDs, physical activity, diet, alcohol, calendar year.                                                             | After 14-16 years of follow up, statin use was associated with reduced incidence of renal cell carcinoma in women with no dose-response relation.                                                                                                 |
| Tsan <i>et al.</i> (2012) <sup>54</sup>      | Liver      | Historical cohort                                                                | 33,413 HBV infected patients             | Age, sex, income, level of urbanization, other lipid lowering agents, aspirin, ACE inhibitors, alcohol related disease, cirrhosis, DM, anti-HBV treatment | Follow up 328,946 person-years. Dose-response relationship between statin use and reduced HCC risk HR = 0.66 (0.44–0.99), 0.41 (0.27–0.61), 0.34 (0.18–0.67) for                                                                                  |

|                                            |            |                             |                                                                                                                                                |                                                                                                                                                                                                            |                                                                                                                                                                                                                                                                                                                                                                    |
|--------------------------------------------|------------|-----------------------------|------------------------------------------------------------------------------------------------------------------------------------------------|------------------------------------------------------------------------------------------------------------------------------------------------------------------------------------------------------------|--------------------------------------------------------------------------------------------------------------------------------------------------------------------------------------------------------------------------------------------------------------------------------------------------------------------------------------------------------------------|
|                                            |            |                             |                                                                                                                                                |                                                                                                                                                                                                            | increasing cumulative defined daily doses. No effect with pravastatin.                                                                                                                                                                                                                                                                                             |
| Khurana <i>et al.</i> (2007) <sup>55</sup> | Lung       | Retrospective case-control  | 7,280 lung cancer patients, 476,453 controls with no lung cancer                                                                               | Age, sex, BMI, smoking, diabetes, race (note: there is possible time-window bias that was not adjusted for). In a time dependent analysis of a similar cohort there was no effect to statins <sup>56</sup> | Statins use >6 months was associated with a 55% risk reduction OR = 0.45 (0.42–0.48)                                                                                                                                                                                                                                                                               |
| Nguyen <i>et al.</i> (2010) <sup>57</sup>  | Oesophagus | Retrospective case-control  | 116 oesophageal adenocarcinoma patients, 696 no adenocarcinoma controls, all with Barrett's oesophagus                                         | Age, race, outpatient encounters, comorbidity, socio-economic status, PPI, NSAID/aspirin (for statin analysis)                                                                                             | Reduction in adenocarcinoma risk in statin users IRR = 0.55 (0.36–0.86). Greater risk reduction with longer duration of statin use.                                                                                                                                                                                                                                |
| Beals <i>et al.</i> (2012) <sup>58</sup>   | Oesophagus | Retrospective case-control  | 112 oesophageal adenocarcinoma patients, 448 age-, sex-matched controls attending upper GI endoscopy gastroscopy.                              | BMI, gender, smoking, alcohol, DM, aspirin, metformin, NSAID.                                                                                                                                              | Statin use was associated with lower adenocarcinoma risk OR = 0.52 (0.27–0.92). Aspirin use was also associated with reduced risk, and further reduction with aspirin and statin combination OR = 0.27 (0.05–0.67). Greater risk reduction with longer duration and higher doses of statins. Both hydrophilic and lipophilic statins associated with reduced risk. |
| Chiu <i>et al.</i> (2011) <sup>59</sup>    | Stomach    | Retrospective case-control. | 337 gastric cancer cases, 1,348 age-, sex-, index date-matched controls, who were admitted to the hospital for diagnoses unrelated to statins. | Helicobacter Pylori eradication, peptic ulcer, aspirin, NSAIDs, PPI, other lipid lowering drugs                                                                                                            | Ever-use of statin associated with decreased gastric cancer risk OR = 0.68 (0.49–0.95). Trend toward decreasing risk with increasing cumulative dose.                                                                                                                                                                                                              |
| Khurana <i>et al.</i> (2007) <sup>60</sup> | Pancreas   | Retrospective case-control  | 475 pancreatic cancer patients, 483,258                                                                                                        | Age, sex, BMI, smoking, DM, race (note: time-window                                                                                                                                                        | Statins use >6 months associated with                                                                                                                                                                                                                                                                                                                              |

|                                                                                                                                                                                                                                                                                                                                                                                                                                                                                                                                                                                                                                                  |                           |                             |                                                                                                                      |                                                                                                                                                                              |                                                                                                                                            |
|--------------------------------------------------------------------------------------------------------------------------------------------------------------------------------------------------------------------------------------------------------------------------------------------------------------------------------------------------------------------------------------------------------------------------------------------------------------------------------------------------------------------------------------------------------------------------------------------------------------------------------------------------|---------------------------|-----------------------------|----------------------------------------------------------------------------------------------------------------------|------------------------------------------------------------------------------------------------------------------------------------------------------------------------------|--------------------------------------------------------------------------------------------------------------------------------------------|
|                                                                                                                                                                                                                                                                                                                                                                                                                                                                                                                                                                                                                                                  |                           |                             | controls with no pancreatic cancer.                                                                                  | bias not accounted for).                                                                                                                                                     | a risk reduction of pancreatic cancer, OR = 0.33 (0.26–0.41). OR = 0.2 (0.13–0.29) with statins use >4 years.                              |
| Bradley <i>et al.</i> (2010) <sup>61</sup>                                                                                                                                                                                                                                                                                                                                                                                                                                                                                                                                                                                                       | Pancreas                  | Retrospective case-control. | 1,141 pancreatic cancer cases, 7,954 general practice site-, sex-, age-matched controls.                             | Smoking, BMI, alcohol, pancreatitis, DM, history of cancer, systemic steroids, HRT.                                                                                          | Mean follow up 10.6 years. Use of statins (mostly simvastatin and atorvastatin) not associated with pancreatic cancer risk reduction       |
| El-Serag <i>et al.</i> (2009) <sup>62</sup>                                                                                                                                                                                                                                                                                                                                                                                                                                                                                                                                                                                                      | Liver                     | Retrospective case-control  | 1,303 HCC patients, 5,212 age-, gender-, date –matched controls, all DM patients.                                    | Race, alcoholism, cirrhosis, hepatitis C, hepatitis B, obesity, alcoholic liver disease, aspirin, NSAIDs, ACE inhibitors, cirrhosis, diabetes medications, propensity score. | Statin use (mostly simvastatin) associated with a HCC risk reduction OR = 0.74 (0.64–0.87).                                                |
| Chiu <i>et al.</i> (2011) <sup>63</sup>                                                                                                                                                                                                                                                                                                                                                                                                                                                                                                                                                                                                          | Liver                     | Retrospective case-control  | 1,166 liver cancer cases, 1,166 age-, sex-, index date-matched controls hospitalized for non-statin related reasons. | Hepatitis B, hepatitis C, cirrhosis, alcoholic liver disease, DM, NSAIDs, ACE inhibitors, other lipid-lowering drugs.                                                        | Use of statins associated with reduced liver cancer risk OR = 0.62 (0.45–0.83). The association among high dose users was not significant. |
| Yu <i>et al.</i> (2009) <sup>64</sup>                                                                                                                                                                                                                                                                                                                                                                                                                                                                                                                                                                                                            | Female reproductive organ | Cross-sectional             | 586 endometrial cancer cases within 73,336 women, 326 ovarian cancer cases within 93,619 women                       | Age, BMI, smoking, parity, DM, hormonal therapy, other lipid lowering drugs, hyperlipidaemia, endometriosis                                                                  | Median follow up 5.6-5.8 years. Non-significant decrease of gynaecological cancers in statin users (mostly simvastatin and lovastatin)     |
| Abbreviations: ACE, angiotensin converting enzyme; CAD, coronary artery disease; CIMP, CpG island methylator phenotype; COX-2, cyclooxygenase-2; CRC, colorectal cancer; CVD, cardiovascular disease; DM, diabetes mellitus; FOBT, faecal occult blood test; GI, gastrointestinal; HBV, hepatitis B virus; HCC, hepatocellular cancer; HR, hazard ratio; HRT, hormonal replacement therapy; IBD, inflammatory bowel disease; IHD, ischemic heart disease; IRR, incidence rate ratio; PPI, proton pump inhibitor; NSAIDs, non-steroidal anti-inflammatory drugs; OR, odds ratio; RCT, randomized controlled trial; RR, relative risk, rate ratio. |                           |                             |                                                                                                                      |                                                                                                                                                                              |                                                                                                                                            |

1. Shepherd, J. *et al.* Prevention of coronary heart disease with pravastatin in men with hypercholesterolemia. West of Scotland Coronary Prevention Study Group. *N. Engl. J. Med.* **333**, 1301–1307 (1995).
2. Sacks, F. M. *et al.* The effect of pravastatin on coronary events after myocardial infarction in patients with average cholesterol levels. Cholesterol and Recurrent Events Trial investigators. *N. Engl. J. Med.* **335**, 1001–1009 (1996).
3. No authors listed] Prevention of cardiovascular events and death with pravastatin in patients with coronary heart disease and a broad range of initial cholesterol levels. The Long-Term Intervention with Pravastatin in Ischaemic Disease (LIPID) Study Group. *N. Engl. J. Med.* **339**, 1349–1357 (1998).
4. Downs, J. R. *et al.* Primary prevention of acute coronary events with lovastatin in men and women with average

- cholesterol levels: results of AFCAPS/TexCAPS. Air Force/Texas Coronary Atherosclerosis Prevention Study. *JAMA* **279**, 1615–1622 (1998).
5. ALLHAT Officers and Coordinators for the ALLHAT Collaborative Research Group. Major outcomes in moderately hypercholesterolemic, hypertensive patients randomized to pravastatin vs usual care: The Antihypertensive and Lipid-Lowering Treatment to Prevent Heart Attack Trial (ALLHAT-LLT). *JAMA* **288**, 2998–3007 (2002).
  6. Shepherd, J. *et al.* PROspective Study of Pravastatin in the Elderly at Risk. Pravastatin in elderly individuals at risk of vascular disease (PROSPER): a randomised controlled trial. *Lancet* **360**, 1623–1630 (2002).
  7. Heart Protection Study Collaborative Group. The effects of cholesterol lowering with simvastatin on cause-specific mortality and on cancer incidence in **20**, 536 high-risk people: a randomized placebo-controlled trial [ISRCTN48489393]. Heart Protection Study Collaborative Group. *BMC Med.* **3**, 6 (2005).
  8. Pedersen, T. R. *et al.* Follow-up study of patients randomized in the Scandinavian simvastatin survival study (4S) of cholesterol lowering. *Am. J. Cardiol.* **86**, 257–262 (2000).
  9. Strandberg, T. E. *et al.* Mortality and incidence of cancer during 10-year follow-up of the Scandinavian Simvastatin Survival Study (4S). *Lancet* **364**, 771–777 (2004).
  10. Bulbulia, R. *et al.* Effects on 11-year mortality and morbidity of lowering LDL cholesterol with simvastatin for about 5 years in **20**, 536 high-risk individuals: a randomised controlled trial. *Lancet* **378**, 2013–2020 (2011).
  11. Jacobs, E. J., Newton, C. C., Thun, M. J. & Gapstur, S. M. Long-term use of cholesterol-lowering drugs and cancer incidence in a large United States cohort. *Cancer Res.* **71**, 1763–1771 (2011).
  12. Kaye, J. A. & Jick, H. Statin use and cancer risk in the General Practice Research Database. *Br. J. Cancer* **90**, 635–637 (2004).
  13. Friis, S. *et al.* Cancer risk among statin users: a population-based cohort study. *Int. J. Cancer* **114**, 643–647 (2005).
  14. Setoguchi, S., Glynn, R. J., Avorn, J., Mogun, H. & Schneeweiss, S. Statins and the risk of lung, breast, and colorectal cancer in the elderly. *Circulation* **115**, 27–33 (2007).
  15. Farwell, W. R. *et al.* The association between statins and cancer incidence in a veterans population. *J. Natl Cancer Inst.* **100**, 134–139 (2008).
  16. Smeeth, L., Douglas, I., Hall, A. J., Hubbard, R. & Evans, S. Effect of statins on a wide range of health outcomes: a cohort study validated by comparison with randomized trials. *Br. J. Clin. Pharmacol.* **67**, 99–109 (2009).
  17. Friedman, G. D. *et al.* Screening statins for possible carcinogenic risk: up to 9 years of follow-up of **361**, 859 recipients. *Pharmacoepidemiol. Drug Saf.* **17**, 27–36 (2008).
  18. Haukka, J. *et al.* Incidence of cancer and statin usage–record linkage study. *Int. J. Cancer* **126**, 279–284 (2010).
  19. Marelli, C. *et al.* Statins and risk of cancer: a retrospective cohort analysis of **45**, 857 matched pairs from an electronic medical records database of 11 million adult Americans. *J. Am. Coll. Cardiol.* **58**, 530–537 (2011).
  20. Fröhlich, G. M. *et al.* Statins and the risk of cancer after heart transplantation. *Circulation* **126**, 440–447 (2012).
  21. Nielsen, S. F., Nordestgaard, B. G. & Bojesen, S. E. Statin use and reduced cancer-related mortality. *N. Engl. J. Med.* **367**, 1792–1802 (2012).
  22. Blais, L., Desgagné, A. & LeLorier, J. 3-Hydroxy-3-methylglutaryl coenzyme A reductase inhibitors and the risk of cancer: a nested case-control study. *Arch. Intern. Med.* **160**, 2363–2368 (2000).
  23. Graaf, M. R., Beiderbeck, A. B., Egberts, A. C., Richel, D. J. & Guchelaar, H. J. The risk of cancer in users of statins. *J. Clin. Oncol.* **22**, 2388–2394 (2004).
  24. Vinogradova, Y., Coupland, C. & Hippisley-Cox, J. Exposure to statins and risk of common cancers: a series of nested case-control studies. *BMC Cancer* **11**, 409 (2011).
  25. Cauley, J. A. *et al.* Lipid-lowering drug use and breast cancer in older women: a prospective study. *J. Womens Health (Larchmt).* **12**, 749–756 (2003).
  26. Cauley, J. A. *et al.* Statin use and breast cancer: prospective results from the Women's Health Initiative. *J. Natl Cancer Inst.* **98**, 700–707 (2006).
  27. Kwan, M. L., Habel, L. A., Flick, E. D., Quesenberry, C. P. & Cnaan, B. Post-diagnosis statin use and breast cancer recurrence in a prospective cohort study of early stage breast cancer survivors. *Breast Cancer Res. Treat.* **109**, 573–579 (2008).
  28. Boudreau, D. M., Yu, O., Miglioretti, D. L., Buist, D. S., Heckbert, S. R. & Daling, J. R. Statin use and breast cancer risk in a large population-based setting. *Cancer Epidemiol. Biomarkers Prev.* **16**, 416–421 (2007).
  29. Ahern, T. P. *et al.* Statin prescriptions and breast cancer recurrence risk: a Danish nationwide prospective cohort study. *J. Natl Cancer Inst.* **103**, 1461–1468 (2011).
  30. Kaye, J. A., Meier, C. R., Walker, A. M. & Jick, H. Statin use, hyperlipidaemia, and the risk of breast cancer. *Br. J. Cancer* **86**, 1436–1439 (2002).
  31. Boudreau, D. M. *et al.* The association between 3-hydroxy-3-methylglutaryl coenzyme A inhibitor use and breast carcinoma risk among postmenopausal women: a case-control study. *Cancer* **100**, 2308–2316 (2004).
  32. Woditschka, S., Habel, L. A., Udaltsova, N., Friedman, G. D. & Sieh, W. Lipophilic statin use and risk of breast cancer subtypes. *Cancer Epidemiol. Biomarkers Prev.* **19**, 2479–2487 (2010).
  33. Jacobs, E. J. *et al.* Cholesterol-lowering drugs and colorectal cancer incidence in a large United States cohort. *J. Natl Cancer Inst.* **98**, 69–72 (2006).
  34. Ng, K. *et al.* Relationship between statin use and colon cancer recurrence and survival: results from CALGB

89803. *J. Natl Cancer Inst.* **103**, 1540–1551 (2011).
35. Lee, J. E. *et al.* Statin use and colorectal cancer risk according to molecular subtypes in two large prospective cohort studies. *Cancer Prev. Res. (Phila.)* **4**, 1808–1815 (2011).
  36. Simon, M. S. *et al.* Prospective analysis of association between use of statins or other lipid-lowering agents and colorectal cancer risk. *Ann. Epidemiol.* **22**, 17–27 (2012).
  37. Bertagnolli, M. M. *et al.* Statin use and colorectal adenoma risk: results from the adenoma prevention with celecoxib trial. *Cancer Prev. Res. (Phila.)* **3**, 588–596 (2010).
  38. Poynter, J. N. *et al.* Statins and the risk of colorectal cancer. *N. Engl. J. Med.* **352**, 2184–2192 (2005).
  39. Samadder, N. J. *et al.* Risk of colorectal cancer in self-reported inflammatory bowel disease and modification of risk by statin and NSAID use. *Cancer* **117**, 1640–1648 (2011).
  40. Coogan, P. F., Smith, J. & Rosenberg, L. Statin use and risk of colorectal cancer. *J. Natl Cancer Inst.* **99**, 32–40 (2007).
  41. Vinogradova, Y., Hippisley-Cox, J., Coupland, C. & Logan, R. F. Risk of colorectal cancer in patients prescribed statins, nonsteroidal anti-inflammatory drugs, and cyclooxygenase-2 inhibitors: nested case-control study. *Gastroenterology* **133**, 393–402 (2007).
  42. Hoffmeister, M., Chang-Claude, J. & Brenner, H. Individual and joint use of statins and low-dose aspirin and risk of colorectal cancer: a population-based case-control study. *Int. J. Cancer* **121**, 1325–1330 (2007).
  43. Yang, Y. X. *et al.* Chronic statin therapy and the risk of colorectal cancer. *Pharmacoepidemiol. Drug Saf.* **17**, 869–876 (2008).
  44. Hachem, C., Morgan, R., Johnson, M., Kuebler, M. & El-Serag, H. Statins and the risk of colorectal carcinoma: a nested case-control study in veterans with diabetes. *Am. J. Gastroenterol.* **104**, 1241–1248 (2009).
  45. Robertson, D. J. *et al.* Neither long-term statin use nor atherosclerotic disease is associated with risk of colorectal cancer. *Clin. Gastroenterol. Hepatol.* **8**, 1056–1061 (2010).
  46. Cheng, M. H. *et al.* Statin use and the risk of colorectal cancer: a population-based case-control study. *World J. Gastroenterol.* **17**, 5197–5202 (2011).
  47. Broughton, T., Sington, J. & Beales, I. L. Statin use is associated with a reduced incidence of colorectal cancer: a colonoscopy-controlled case-control study. *BMC Gastroenterol.* **12**, 36 (2012).
  48. Lakha, F. *et al.* Statin use and association with colorectal cancer survival and risk: case control study with prescription data linkage. *BMC Cancer* **12**, 487 (2012).
  49. Broughton, T., Sington, J. & Beales, I. L. Statin use is associated with a reduced incidence of colorectal adenomatous polyps. *Int. J. Colorectal Dis.* **28**, 469–476 (2013).
  50. Kawata, S. *et al.* Effect of pravastatin on survival in patients with advanced hepatocellular carcinoma. A randomized controlled trial. *Br. J. Cancer* **84**, 886–891 (2001).
  51. Kastelein, F. *et al.* Nonsteroidal anti-inflammatory drugs and statins have chemopreventative effects in patients with Barrett's esophagus. *Gastroenterology* **141**, 2000–2008 (2011).
  52. Kantor, E. D., Onstad, L., Blount, P. L., Reid, B. J. & Vaughan, T. L. Use of statin medications and risk of esophageal adenocarcinoma in persons with Barrett's esophagus. *Cancer Epidemiol. Biomarkers Prev.* **21**, 456–461 (2012).
  53. Liu, W., Choueiri, T. K. & Cho, E. Statin use and the risk of renal cell carcinoma in 2 prospective US cohorts. *Cancer* **118**, 797–803 (2012).
  54. Tsan, Y. T., Lee, C. H., Wang, J. D. & Chen, P. C. Statins and the risk of hepatocellular carcinoma in patients with hepatitis B virus infection. *J. Clin. Oncol.* **30**, 623–630 (2012).
  55. Khurana, V., Bejjanki, H. R., Caldito, G. & Owens, M. W. Statins reduce the risk of lung cancer in humans: a large case-control study of US veterans. *Chest* **131**, 1282–1288 (2007).
  56. Suissa, S., Dell'aniello, S., Vahey, S. & Renoux, C. Time-window bias in case-control studies: statins and lung cancer. *Epidemiology* **22**, 228–231 (2011).
  57. Nguyen, D. M., Richardson, P. & El-Serag, H. B. Medications (NSAIDs, statins, proton pump inhibitors) and the risk of esophageal adenocarcinoma in patients with Barrett's esophagus. *Gastroenterology* **138**, 2260–2266 (2010).
  58. Beales, I. L., Vardi, I., Dearman, L. & Broughton, T. Statin use is associated with a reduction in the incidence of esophageal adenocarcinoma: a case control study. *Dis. Esophagus*. <http://dx.doi.org/10.1111/j.1442-2050.2012.01412x>.
  59. Chiu, H. F., Ho, S. C., Chang, C. C., Wu, T. N. & Yang, C. Y. Statins are associated with a reduced risk of gastric cancer: a population-based case-control study. *Am. J. Gastroenterol.* **106**, 2098–2103 (2011).
  60. Khurana, V., Sheth, A., Caldito, G. & Barkin, J. S. Statins reduce the risk of pancreatic cancer in humans: a case-control study of half a million veterans. *Pancreas* **34**, 260–265 (2007).
  61. Bradley, M. C., Hughes, C. M., Cantwell, M. M. & Murray, L. J. Statins and pancreatic cancer risk: a nested case-control study. *Cancer Causes Control* **21**, 2093–2100 (2010).
  62. El-Serag, H. B., Johnson, M. L., Hachem, C. & Morgana, R. O. Statins are associated with a reduced risk of hepatocellular carcinoma in a large cohort of patients with diabetes. *Gastroenterology* **136**, 1601–1608 (2009).
  63. Chiu, H. F., Ho, S. C., Chen, C. C. & Yang, C. Y. Statin use and the risk of liver cancer: a population-based case-control study. *Am. J. Gastroenterol.* **106**, 894–898 (2011).
  64. Yu, O., Boudreau, D. M., Buist, D. S. & Miglioretti, D. L. Statin use and female reproductive organ cancer risk in a large population-based setting. *Cancer Causes Control* **20**, 609–616 (2009).
