# Supplementary material for: Beyond aspirin—cancer prevention with statins, metformin and bisphosphonates
Source: Springer Nature journal article supplement (doi:10.1038/nrclinonc.2013.169), 2013-10-01
Supplement: 41571_2013_BFnrclinonc2013169_MOESM17_ESM.pdf [file 41571_2013_BFnrclinonc2013169_MOESM17_ESM.pdf]

| Supplementary Table 2   <i>In vitro</i> mechanistic studies of possible modes of action of statins |                                                                  |                                                                                                                                                                                                                                                                                                                                                                                                                                          |                                                              |
|----------------------------------------------------------------------------------------------------|------------------------------------------------------------------|------------------------------------------------------------------------------------------------------------------------------------------------------------------------------------------------------------------------------------------------------------------------------------------------------------------------------------------------------------------------------------------------------------------------------------------|--------------------------------------------------------------|
| Study                                                                                              | Statin                                                           | Major findings                                                                                                                                                                                                                                                                                                                                                                                                                           | Effect reversed by                                           |
| <b>Multiple cancer cell lines</b>                                                                  |                                                                  |                                                                                                                                                                                                                                                                                                                                                                                                                                          |                                                              |
| Keyomarsi <i>et al.</i> (1991) <sup>1</sup>                                                        | Lovastatin                                                       | Synchronization of normal and tumour cells reversibly in the G <sub>1</sub> phase of the cell cycle                                                                                                                                                                                                                                                                                                                                      | Mevalonic acid                                               |
| Spampanato <i>et al.</i> (2012) <sup>2</sup>                                                       | Simvastatin                                                      | Induction of apoptosis features only in cancer cells. Overexpression of <i>BAX</i> and inhibition of <i>BCL2</i>                                                                                                                                                                                                                                                                                                                         | –                                                            |
| Malenda <i>et al.</i> (2012) <sup>3</sup>                                                          | Atorvastatin, cerivastatin, fluvastatin, lovastatin, simvastatin | Decrease in glucose analogue uptake in tumour cells                                                                                                                                                                                                                                                                                                                                                                                      | Mevalonic acid, FPP, cholesterol                             |
| Menter <i>et al.</i> (2011) <sup>4</sup>                                                           | Pravastatin, simvastatin                                         | Simvastatin inhibited growth of most tumour cell lines more effectively than pravastatin. Poorly differentiated cancer cells more responsive than well-differentiated cancer cells. Alterations in mitochondrial networks, changes in cellular morphology related to cofilin regulation and loss of p-caveolin. Redistribution of solute carrier organic anion transporter family member 1B1 and HMG-CoA reductase to perinuclear sites. | –                                                            |
| Nübel <i>et al.</i> (2004) <sup>5</sup>                                                            | Lovastatin, simvastatin                                          | Inhibition of TNF- $\alpha$ induced E-selectin expression, and cell adhesion and invasion                                                                                                                                                                                                                                                                                                                                                | GGPP                                                         |
| <b>Endothelial cancer cell lines</b>                                                               |                                                                  |                                                                                                                                                                                                                                                                                                                                                                                                                                          |                                                              |
| Vincent <i>et al.</i> (2001) <sup>6</sup>                                                          | Cerivastatin                                                     | Inhibition of angiogenesis, due to decrease in endothelial cell locomotion, mainly related to delocalization of transforming protein RhoA from cell membrane to cytoplasm. Decrease in MMP-2 secretion.                                                                                                                                                                                                                                  | GGPP; MMP-2 decrease reversed by FPP                         |
| <b>Breast cancer cell lines</b>                                                                    |                                                                  |                                                                                                                                                                                                                                                                                                                                                                                                                                          |                                                              |
| Addeo <i>et al.</i> (1996) <sup>7</sup>                                                            | Lovastatin, simvastatin                                          | DNA synthesis reduced by >90% in normal and transformed cells.                                                                                                                                                                                                                                                                                                                                                                           | 17 $\beta$ -estradiol (in oestrogen-receptor positive cells) |
| Sánchez <i>et al.</i> (2008) <sup>8</sup>                                                          | Fluvastatin, simvastatin, atorvastatin                           | Antiproliferation, decrease in DNA synthesis, cell-cycle arrest in G <sub>1</sub> and G <sub>2</sub> /M. Fluvastatin caused loss in mitochondrial membrane potential. Increase in ROS production.                                                                                                                                                                                                                                        | Antioxidant N-acetyl-cysteine abrogated ROS increase         |
| Kang <i>et al.</i> (2009) <sup>9</sup>                                                             | Lovastatin, simvastatin                                          | Decreased isoprenylated HRAS in membrane fraction. Inhibited HRAS-induced invasion. Down regulated MMP-9, MMP-2. Inactivated HRAS downstream signalling molecules.                                                                                                                                                                                                                                                                       | Inhibited invasion reversed by FPP                           |
| Klawitter <i>et al.</i> (2010) <sup>10</sup>                                                       | Lovastatin                                                       | Inhibition of proliferation. In proteomic profiling: decreased expression of active RAS. Modulation of E2F1 pathway through regulation of expression of prohibitin and Rb, leading to changes in MCM7 and MSH2. Regulation of AKT signalling pathway. Metabolomics: suppression of glycolytic and Krebs cycle activity, and lipid biosynthesis.                                                                                          | –                                                            |
| <b>Lung cancer cell lines</b>                                                                      |                                                                  |                                                                                                                                                                                                                                                                                                                                                                                                                                          |                                                              |
| Maksimova <i>et al.</i> (2008) <sup>11</sup>                                                       | Lovastatin                                                       | Increase in apoptosis and necrosis in 3 of 4 cell lines. Reduced cell survival with increase in cell-cycle check-point inhibitors p21 <sup>WAF</sup> and/or p27 <sup>KIP</sup> , and decrease in cyclin D1. Decreased glutathione. Increased cytochrome C release and increased activated caspase-3.                                                                                                                                     | –                                                            |
| Pelaia <i>et al.</i> (2012) <sup>12</sup>                                                          | Simvastatin                                                      | Reduced ERK phosphorylation, induction of apoptosis.                                                                                                                                                                                                                                                                                                                                                                                     | –                                                            |
| Chen <i>et al.</i> (2012) <sup>13</sup>                                                            | Atorvastatin                                                     | VEGF expression inhibition via ROS production inhibition, through suppression of Rac1/NAPDH oxidase activity, and upregulation of glutathione peroxidase and catalase activity.                                                                                                                                                                                                                                                          | –                                                            |
| <b>Colorectal cancer cell lines</b>                                                                |                                                                  |                                                                                                                                                                                                                                                                                                                                                                                                                                          |                                                              |
| Agarwal <i>et al.</i> (1999) <sup>14</sup>                                                         | Lovastatin                                                       | Increased apoptosis induced by 5-FU or cisplatin. Decreased expression of the antiapoptotic protein BCL2, increased expression of the proapoptotic protein BAX.                                                                                                                                                                                                                                                                          | GGPP                                                         |
| Notarnicola <i>et al.</i> (2004) <sup>15</sup>                                                     | Simvastatin                                                      | Antiproliferative and proapoptotic effects in one cell line, cell growth inhibition and no apoptosis in another cell line.                                                                                                                                                                                                                                                                                                               | –                                                            |
| Kodach <i>et al.</i> (2007) and                                                                    | Lovastatin                                                       | Differing sensitivities of different cell lines. In sensitive cell lines: induction of BMP2 levels by causing BMP2 promoter                                                                                                                                                                                                                                                                                                              | Noggin (specific inhibitor of                                |

|                                                  |                                        |                                                                                                                                                                                                                                          |                                                             |
|--------------------------------------------------|----------------------------------------|------------------------------------------------------------------------------------------------------------------------------------------------------------------------------------------------------------------------------------------|-------------------------------------------------------------|
| (2011) <sup>16,17</sup>                          |                                        | demethylation, activation of BMP pathway, induction of BMP target gene <i>ID2</i> . Altering gene expression causing a shift from a stem-like state to a more-differentiated state.                                                      | BMPs). <i>SMAD4</i> knockout.                               |
| <b>Oesophageal cancer cell lines</b>             |                                        |                                                                                                                                                                                                                                          |                                                             |
| Sadaria <i>et al.</i> (2011) <sup>18</sup>       | Simvastatin, atorvastatin, pravastatin | Simvastatin caused decreased cell viability and proliferation, increased apoptosis, and attenuation of ICAM-1 expression and NF- $\kappa$ B activation. Atorvastatin had mild effects and pravastatin had no effect.                     | –                                                           |
| <b>Pancreatic cancer cell lines</b>              |                                        |                                                                                                                                                                                                                                          |                                                             |
| Kusama <i>et al.</i> (2001) <sup>19</sup>        | Lovastatin fluvastatin                 | Attenuated EGF-induced membrane translocation of transforming protein RhoA, and inhibited EGF-induced cancer cell invasion.                                                                                                              | All- <i>trans</i> geranylgeraniol                           |
| <b>Cholangiocarcinoma cell lines</b>             |                                        |                                                                                                                                                                                                                                          |                                                             |
| Miller <i>et al.</i> (2011) <sup>20</sup>        | Simvastatin                            | Reduction in cell viability and apoptosis. RAC1/lipid rafts co-localization and RAC1 activity reduction.                                                                                                                                 | Mevalonate, FPP, GGPP (partial blockade). Cholesterol.      |
| Kamigaki <i>et al.</i> (2011) <sup>21</sup>      | Atorvastatin, pitavastatin             | Suppressed cell proliferation. Sub-G <sub>1</sub> fraction increase. Increased caspase-3 level, ERK reduction. Additive proliferation suppression with statin pretreatment compared with chemotherapy alone.                             | –                                                           |
| <b>Liver cancer cell lines</b>                   |                                        |                                                                                                                                                                                                                                          |                                                             |
| Relja <i>et al.</i> (2010) <sup>22</sup>         | Simvastatin                            | Cell growth reduction, apoptosis induction, impaired cell-cycle progression, inhibition of CDKs and cyclins, enhanced CDK inhibitors p19, p27                                                                                            | –                                                           |
| Kah <i>et al.</i> (2012) <sup>23</sup>           | Multiple                               | Fluvastatin, simvastatin, lovastatin caused cell viability reduction and apoptosis induction, only in hepatoma cells and not in normal hepatocytes—only after <i>TP53</i> knockdown in <i>TP53</i> overexpressed cell line.              | Mevalonate, GGPP                                            |
| <b>Renal cancer cell lines</b>                   |                                        |                                                                                                                                                                                                                                          |                                                             |
| Woodard <i>et al.</i> (2008) <sup>24</sup>       | Fluvastatin                            | Apoptosis induction, proliferation suppression via inhibition of AKT/mTOR pathway.                                                                                                                                                       | –                                                           |
| <b>Bladder cancer cell lines</b>                 |                                        |                                                                                                                                                                                                                                          |                                                             |
| Jakóbsiak <i>et al.</i> (1991) <sup>25</sup>     | Lovastatin                             | G <sub>1</sub> arrest. Reduction in proliferation-associated nuclear proteins Ki-67 and p105 expression. Dissociation of p21ras from the cell membrane translocation toward the cytoplasm                                                | Mevalonate                                                  |
| <b>Ovarian cancer cell lines</b>                 |                                        |                                                                                                                                                                                                                                          |                                                             |
| Martirosyan <i>et al.</i> (2010) <sup>26</sup>   | Lovastatin                             | Apoptosis induction in a p53-independent manner. Doxorubicin synergism by blocking doxorubicin efflux from cells.                                                                                                                        | Mevalonate, FPP, GGPP                                       |
| <b>Thyroid cancer cell lines</b>                 |                                        |                                                                                                                                                                                                                                          |                                                             |
| Laezza <i>et al.</i> (2008) <sup>27</sup>        | Lovastatin                             | RAS activation blockade through farnesylation inhibition. Apoptosis induction. Increased ROS levels through ERK1/2 signalling inhibition and Mn-SOD expression.                                                                          | Antioxidant pyrrolidine dithiocarbamate, SOD-mimetic        |
| Zeybek <i>et al.</i> (2011) <sup>28</sup>        | Rosuvastatin                           | Decreased cell viability, G <sub>1</sub> phase arrest. Caspase-3 activity and apoptotic index increase.                                                                                                                                  | –                                                           |
| Zhong <i>et al.</i> (2011) <sup>29</sup>         | Lovastatin                             | G <sub>0</sub> /G <sub>1</sub> arrest. Inhibited proliferation. Rho geranylgeranylation reduction, p27 and CDK4 increase. Cyclin A2, cyclin D3, Rb protein level decrease. Increased CDK2-p27 complex formation, CDK2 activity decrease. | p27 antisense oligonucleotide, mevalonate, GGPP (partially) |
| Shui <i>et al.</i> (2012) <sup>30</sup>          | Lovastatin                             | Thyroid differentiation. Impact on proteins involved in protein folding, biomolecule metabolism, signal transduction, protein expression and protein degradation.                                                                        | –                                                           |
| <b>Osteosarcoma cell lines</b>                   |                                        |                                                                                                                                                                                                                                          |                                                             |
| Fromigué <i>et al.</i> (2008) <sup>31</sup>      | Atorvastatin                           | Reduced cell migration and invasion, GGPP-dependent, independent of apoptosis induction. Reduced MMP-2, MMP-9, MMP-14, TIMP2 expression via inhibited JNK.                                                                               | MMP-2, MMP-14, JNK, mevalonate, GGPP, RhoA                  |
| <b>Neuroblastoma cell lines</b>                  |                                        |                                                                                                                                                                                                                                          |                                                             |
| Dimitroulakos <i>et al.</i> (1996) <sup>32</sup> | Lovastatin                             | Cytotoxicity restricted to drug-resistant P-glycoprotein-expressing neuroblastoma. Potentiated by dibutyl cyclic AMP.                                                                                                                    | –                                                           |

| <b>Glioblastoma cell lines</b>                                                                                                                                                                                                 |                                      |                                                                                                                          |            |
|--------------------------------------------------------------------------------------------------------------------------------------------------------------------------------------------------------------------------------|--------------------------------------|--------------------------------------------------------------------------------------------------------------------------|------------|
| Bouterfa <i>et al.</i> (2000) <sup>33</sup>                                                                                                                                                                                    | Lovastatin                           | Block in RAS-mediated signalling. Reduced proliferation, apoptosis induction                                             | Mevalonate |
| Yanae <i>et al.</i> (2011) <sup>34</sup>                                                                                                                                                                                       | Mevastatin, fluvastatin, simvastatin | Cell proliferation inhibition, apoptosis induction. Caspase-3 activity increase. Decreased extracellular ERK1/2 and Akt. | GGPP       |
| Abbreviations: 5-FU, 5-fluorouracil; BMP, bone morphogenic protein; CDK, cyclin dependent kinase; FPP, farnesyl pyrophosphate; GGPP, geranylgeranylpyrophosphate; MMP, matrix metalloproteinase; ROS, reactive oxygen species. |                                      |                                                                                                                          |            |

1. Keyomarsi, K., Sandoval, L., Band, V. & Pardee, A. B. Synchronization of tumor and normal cells from G1 to multiple cell cycles by lovastatin. *Cancer Res.* **51**, 3602–3609 (1991).
2. Spampanato, C. *et al.* Simvastatin inhibits cancer cell growth by inducing apoptosis correlated to activation of Bax and down-regulation of BCL-2 gene expression. *Int. J. Oncol.* **40**, 935–941 (2012).
3. Malenda, A. *et al.* Statins impair glucose uptake in tumor cells. *Neoplasia* **14**, 4 (2012).
4. Menter, D. G. *et al.* Differential effects of pravastatin and simvastatin on the growth of tumor cells from different organ sites. *PLoS ONE* **6**, e28813 (2011).
5. Nübel, T., Dippold, W., Kleinert, H., Kaina, B. & Fritz, G. Lovastatin inhibits Rho-regulated expression of E-selectin by TNFalpha and attenuates tumor cell adhesion. *FASEB J.* **18**, 140–142 (2004).
6. Vincent, L. *et al.* Inhibition of endothelial cell migration by cerivastatin, an HMG-CoA reductase inhibitor: contribution to its anti-angiogenic effect. *FEBS Lett.* **495**, 159–166 (2001).
7. Addeo, R. *et al.* Stimulation of human breast cancer MCF-7 cells with estrogen prevents cell cycle arrest by HMG-CoA reductase inhibitors. *Biochem Biophys Res Commun.* **220**, 864–870 (1996).
8. Sánchez, C. A. *et al.* Statin-induced inhibition of MCF-7 breast cancer cell proliferation is related to cell cycle arrest and apoptotic and necrotic cell death mediated by an enhanced oxidative stress. *Cancer Invest.* **26**, 698–707 (2008).
9. Kang, S., Kim, E. S. & Moon, A. Simvastatin and lovastatin inhibit breast cell invasion induced by H-Ras. *Oncol. Rep.* **21**, 1317–1322 (2009).
10. Klawitter, J., Shokati, T., Moll, V., Christians, U. & Klawitter, J. Effects of lovastatin on breast cancer cells: a proteo-metabonomic study. *Breast Cancer Res.* **12**, R16 (2010).
11. Maksimova, E., Yie, T. A. & Rom WN. *In vitro* mechanisms of lovastatin on lung cancer cell lines as a potential chemopreventive agent. *Lung* **186**, 45–54 (2008).
12. Pelaia, G. *et al.* Effects of statins and farnesyl transferase inhibitors on ERK phosphorylation, apoptosis and cell viability in non-small lung cancer cells. *Cell Prolif.* **45**, 557–565 (2012).
13. Chen, J. *et al.* Atorvastatin reduces vascular endothelial growth factor (VEGF) expression in human non-small cell lung carcinomas (NSCLCs) via inhibition of reactive oxygen species (ROS) production. *Mol Oncol.* **6**, 62–72 (2012).
14. Agarwal, B. *et al.* Lovastatin augments apoptosis induced by chemotherapeutic agents in colon cancer cells. *Clin. Cancer Res.* **5**, 2223–2229 (1999).
15. Notarnicola, M. *et al.* Up-regulation of 3-hydroxy-3-methylglutaryl coenzyme A reductase activity in left-sided human colon cancer. *Anticancer Res.* **24**, 3837–3842 (2004).
16. Kodach, L. L. *et al.* The effect of statins in colorectal cancer is mediated through the bone morphogenetic protein pathway. *Gastroenterology* **133**, 1272–1281 (2007).
17. Kodach, L. L. *et al.* Statins augment the chemosensitivity of colorectal cancer cells inducing epigenetic reprogramming and reducing colorectal cancer cell 'stemness' via the bone morphogenetic protein pathway. *Gut* **60**, 1544–1553 (2011).
18. Sadaria, M. R. *et al.* Statin therapy attenuates growth and malignant potential of human esophageal adenocarcinoma cells. *J. Thorac. Cardiovasc. Surg.* **142**, 1152–1160 (2011).
19. Kusama, T. *et al.* Inhibition of epidermal growth factor-induced RhoA translocation and invasion of human pancreatic cancer cells by 3-hydroxy-3-methylglutaryl-coenzyme a reductase inhibitors. *Cancer Res.* **61**, 4885–4891 (2001).
20. Miller, T. *et al.* Simvastatin stimulates apoptosis in cholangiocarcinoma by inhibition of Rac1 activity. *Dig. Liver Dis.* **43**, 395–403 (2011).
21. Kamigaki, M. *et al.* Statins induce apoptosis and inhibit proliferation in cholangiocarcinoma cells. *Int. J. Oncol.* **39**, 561–568 (2011).
22. Relja, B. *et al.* Simvastatin inhibits cell growth and induces apoptosis and G0/G1 cell cycle arrest in hepatic cancer cells. *Int. J. Mol. Med.* **26**, 735–741 (2010).
23. Kah, J. *et al.* Selective induction of apoptosis by HMG-CoA reductase inhibitors in hepatoma cells and dependence on p53 expression. *Oncol. Rep.* **28**, 1077–1083 (2012).
24. Woodard, J., Sassano, A., Hay, N. & Plataniias, L. C. Statin-dependent suppression of the Akt/mammalian target of rapamycin signaling cascade and programmed cell death 4 up-regulation in renal cell carcinoma. *Clin Cancer Res.* **14**, 4640–4649 (2008).

25. Jakóbsiak, M., Bruno, S., Skierski, J. S. & Darzynkiewicz, Z. Cell cycle-specific effects of lovastatin. *Proc. Natl Acad. Sci. USA* **88**, 3628–3632 (1991).
26. Martirosyan, A., Clendening, J. W., Goard, C. A. & Penn, L. Z. Lovastatin induces apoptosis of ovarian cancer cells and synergizes with doxorubicin: potential therapeutic relevance. *BMC Cancer* **10**, 103 (2010).
27. Laezza, C. *et al.* Lovastatin induces apoptosis of k-ras-transformed thyroid cells via inhibition of ras farnesylation and by modulating redox state. *J. Mol. Med. (Berl.)* **86**, :1341–1351 (2008).
28. Zeybek, N. D. *et al.* Rosuvastatin induces apoptosis in cultured human papillary thyroid cancer cells. *J. Endocrinol.* **210**, 105–115 (2011).
29. Zhong, W. B. *et al.* Lovastatin inhibits proliferation of anaplastic thyroid cancer cells through up-regulation of p27 by interfering with the Rho/ROCK-mediated pathway. *Biochem. Pharmacol.* **82**, 1663–1672 (2011).
30. Shui, H. A., Hsia, C. W., Chen, H. M., Chang, T. C. & Wang, C. Y. Proteomics and bioinformatics analysis of lovastatin-induced differentiation in ARO cells. *J. Proteomics* **75**, 1170–1180 (2012).
31. Fromigué, O., Hamidouche, Z. & Marie, P. J. Blockade of the RhoA-JNK-c-Jun-MMP2 cascade by atorvastatin reduces osteosarcoma cell invasion. *J. Biol. Chem.* **283**, 30549–30556 (2008).
32. Dimitroulakos, J. & Yeger, H. HMG-CoA reductase mediates the biological effects of retinoic acid on human neuroblastoma cells: lovastatin specifically targets P-glycoprotein-expressing cells. *Nat. Med.* **2**, 326–333 (1996).
33. Bouterfa, H. L. *et al.* Inhibition of Ras farnesylation by lovastatin leads to downregulation of proliferation and migration in primary cultured human glioblastoma cells. *Anticancer Res.* **20**, 2761–2771 (2000).
34. Yanae, M. *et al.* Statin-induced apoptosis via the suppression of ERK1/2 and Akt activation by inhibition of the geranylgeranyl-pyrophosphate biosynthesis in glioblastoma. *J. Exp. Clin. Cancer Res.* **30**, 74 (2011).
